# Supplementary material
Source: publisher site journal article supplement (https://www.dovepress.com/article/402109)
Supplement: Supplementary file 1 [file get_supplementary_file.php]

Supplementary Material 1. Reaction PCR primers

UBE2C forward primer: 5′-GGATTTCTGCCTTCCCTGAA-3′,

UBE2C reverse primer : 5′-GATAGCAGGGCGTGAGGAAC-3′,

GAPDH forward primer: 5′-TGACTTCAACAGCGACACCCA-3′ ,

GAPDH reverse primer: 5′-CACCCTGTTGCTGTAGCCAAA-3′.

Supplementary Material 2. Modified histochemistry score (H-score)

| Strength | 0（No staining） | 1 (Weakly stained, Pale yellow) | 2 (Moderate staining, Brownish yellow) | 3 (Strongly stained, tawny) |
| --- | --- | --- | --- | --- |
| Area0-100(%) |
| 0-5% (0) | Negative | Negative | Negative | Negative |
| 6-25% (1) | Negative | Weakly positive | Weakly positive | Moderately positive |
| 26-50% (2) | Negative | Weakly positive | Weakly positive | Moderately positive |
| 51-75% (3) | Negative | Weakly positive | Moderately positive | Strongly positive |
| >75% (4) | Negative | Weakly positive | Moderately positive | Strongly positive |

Supplementary Material 3. The modified histochemistry score results

|  | Train dataset | | | | Test dataset | | | |
| --- | --- | --- | --- | --- | --- | --- | --- | --- |
| Variable | Overall, N = 85a | 0, N = 69a | 1, N = 16a | p-valueb | Overall, N = 36a | 0, N = 29a | 1, N = 7a | p-valuec |
| **Age, Mean(SD)** | 49.7(10.3) | 50.0(10.0) | 48.4(11.8) | 0.7 | 49.7(9.2) | 50.6(9.4) | 46.1(7.6) | 0.6 |
| **PG, n(%)** |  |  |  | **0.017** |  |  |  | 0.057 |
| 1 | 34(40%) | 31(45%) | 3(19%) |  | 19(53%) | 17(59%) | 2(29%) |  |
| 2 | 38(45%) | 31(45%) | 7(44%) |  | 12(33%) | 10(34%) | 2(29%) |  |
| 3 | 13(15%) | 7(10%) | 6(38%) |  | 5(14%) | 2(6.9%) | 3(43%) |  |
| **BMI, Mean(SD)** | 22.1(1.8) | 22.2(1.8) | 21.7(1.8) | 0.2 | 21.9(1.8) | 21.9(2.0) | 21.8(0.8) | >0.9 |
| **Operation, n(%)** | 33(39%) | 26(38%) | 7(44%) | 0.7 | 12(33%) | 11(38%) | 1(14%) | 0.4 |
| **T, n(%)** |  |  |  | 0.3 |  |  |  | 0.3 |
| 1 | 24(28%) | 22(32%) | 2(12%) |  | 12(33%) | 10(34%) | 2(29%) |  |
| 2 | 54(64%) | 41(59%) | 13(81%) |  | 20(56%) | 17(59%) | 3(43%) |  |
| 3 | 7(8.2%) | 6(8.7%) | 1(6.2%) |  | 4(11%) | 2(6.9%) | 2(29%) |  |
| **N, n(%)** |  |  |  | **<0.001** |  |  |  | 0.3 |
| 0 | 39(46%) | 36(52%) | 3(19%) |  | 17(47%) | 14(48%) | 3(43%) |  |
| 1 | 33(39%) | 29(42%) | 4(25%) |  | 15(42%) | 13(45%) | 2(29%) |  |
| 2 | 13(15%) | 4(5.8%) | 9(56%) |  | 4(11%) | 2(6.9%) | 2(29%) |  |
| **ER, n(%)** |  |  |  | **0.028** |  |  |  | 0.12 |
| 1 | 28(33%) | 18(26%) | 10(62%) |  | 6(17%) | 3(10%) | 3(43%) |  |
| 2 | 13(15%) | 12(17%) | 1(6.2%) |  | 11(31%) | 9(31%) | 2(29%) |  |
| 3 | 44(52%) | 39(57%) | 5(31%) |  | 19(53%) | 17(59%) | 2(29%) |  |
| **PR, n(%)** |  |  |  | **0.040** |  |  |  | 0.3 |
| 1 | 42(49%) | 30(43%) | 12(75%) |  | 12(33%) | 8(28%) | 4(57%) |  |
| 2 | 15(18%) | 15(22%) | 0(0%) |  | 6(17%) | 5(17%) | 1(14%) |  |
| 3 | 28(33%) | 24(35%) | 4(25%) |  | 18(50%) | 16(55%) | 2(29%) |  |
| **HER_2, n(%)** | 28(33%) | 25(36%) | 3(19%) | 0.2 | 8(22%) | 7(24%) | 1(14%) | >0.9 |
| **Ki_67, Mean(SD)** | 38.8(18.5) | 35.0(15.9) | 55.3(20.5) | **<0.001** | 38.4(19.6) | 34.3(18.2) | 55.7(16.2) | **0.016** |
| **UBE2C_mRNA, Mean(SD)** | 4.2(0.3) | 4.1(0.3) | 4.5(0.3) | **<0.001** | 4.2(0.3) | 4.1(0.3) | 4.5(0.4) | **0.005** |
| **UBE2C, n(%)** |  |  |  | **0.007** |  |  |  | **0.045** |
| 0 | 1(1.2%) | 1(1.4%) | 0(0%) |  | 2(5.6%) | 1(3.4%) | 1(14%) |  |
| 1 | 17(20%) | 16(23%) | 1(6.2%) |  | 10(28%) | 10(34%) | 0(0%) |  |
| 2 | 47(55%) | 41(59%) | 6(38%) |  | 18(50%) | 15(52%) | 3(43%) |  |
| 3 | 20(24%) | 11(16%) | 9(56%) |  | 6(17%) | 3(10%) | 3(43%) |  |
| **tt, Mean(SD)** | 26.1(10.1) | 26.0(9.8) | 26.8(11.7) | 0.8 | 26.4(10.6) | 27.4(10.4) | 22.1(11.3) | 0.2 |
| aMean(SD) or Median(IQR) or Frequency(%) | | | | | | | | |
| bWilcoxon rank sum test; Fisher's exact test; Pearson's Chi-squared test | | | | | | | | |
| cWilcoxon rank sum test; Fisher's exact test; Wilcoxon rank sum exact test | | | | | | | | |
| The bolded text for this Supplementary Table means P<0.05 | | | | | | | | |
